# Supplementary material for: Three-dimensional supramolecular phosphomolybdate architecture-derived Mo-based electrocatalytic system for overall water splitting
Source: Royal Society of Chemistry journal article supplement (doi:10.1039/c7qi00812k), 2018-01-01
Supplement: c7qi00812k1.pdf [file c7qi00812k1.pdf]

**Electronic Supplementary Information (ESI)**

**Three-dimensional supramolecular phosphomolybdate architecture derived Mo  
based electrocatalytic system for overall water splitting**

Mingliang Mei, Xinxin Xu\*, Yun Wang, Xinjiao Wang\* and Yuqiu Huo\*

*Department of Chemistry, College of Science, Northeastern University, Shenyang,  
Liaoning, 110819, People's Republic of China*

## Catalytic reduction of 4-nitrophenol and RhB

In a typical reaction, freshly prepared NaBH<sub>4</sub> was added in 4-nitrophenol solution. During this process, color of this solution changes from pale yellow to bright yellow. Then, catalyst (2 mg) was added to this solution with stirring. At a given time interval, a certain amount of solution was withdrawn and recorded immediately with UV-vis spectrometer. Apparent rate constant ( $k_{app}$ ) was obtained from first-order rate model with the decay of absorption at 400 nm (Eq. 1). Based on Lambert-Beer law,  $c/c_0 = I/I_0$ , the equation can be converted to  $\ln(I/I_0) = -k_{app}t$  at last.

$$\ln(c/c_0) = -k_{app}t \text{ (Eq. 1)}$$

To study the kinetic process of this reduction reaction, a set of apparent rate constants were obtained with constant NaBH<sub>4</sub> concentration (0.02 mol·L<sup>-1</sup>) while varying concentration of 4-nitrophenol. The concentrations of 4-nitrophenol were  $2 \times 10^{-3}$ ,  $4.0 \times 10^{-3}$ ,  $6 \times 10^{-3}$ ,  $8 \times 10^{-3}$ ,  $1 \times 10^{-2}$  and  $1.2 \times 10^{-2}$  mol·L<sup>-1</sup>. Based on above data, the curve of  $k_{app}$  versus concentration of 4-nitrophenol was drawn. Langmuir-Hinshelwood model (Eq. 2) was employed to fit these curve. In this equation,  $K_{4-NP}$  and  $K_{NaBH_4}$  are the adsorption constants of 4-nitrophenol and NaBH<sub>4</sub>;  $k$  represents the surface rate constant;  $S$  is the surface area;  $n$  and  $m$  are the Freundlich exponents. For 4-nitrophenol and NaBH<sub>4</sub>, these values are 0.6 and 1.0 respectively.

$$k_{app} = k \times S \times K_{4NP}^n [4NP]^{n-1} (K_{BH_4} [BH_4^-])^m / \{1 + (K_{4NP} [4NP])^n + (K_{BH_4} [BH_4^-])^m\}^2$$

(Eq. 2)

For RhB, at first, catalyst (2 mg) was added to its solution (1.0 mL, 10 mg·L<sup>-1</sup>) with stirring. Then freshly prepared NaBH<sub>4</sub> (2.0 mL, 0.02 mol·L<sup>-1</sup>) was added. At a given time interval, a certain amount of solution was withdrawn and recorded immediately with UV-vis spectrometer. The apparent rate constant was calculated based on the

decay of absorption at 553 nm.

**Table S1** The element contents of **MoO<sub>2</sub>@NC** and **Mo<sub>2</sub>C@NC** photocatalysts.

|             | <b>MoO<sub>2</sub>@NC</b> | <b>Mo<sub>2</sub>C@NC(A)</b> | <b>Mo<sub>2</sub>C@NC(B)</b> |
|-------------|---------------------------|------------------------------|------------------------------|
| Mo(%)       | 8.2                       | 8.4                          | 8.5                          |
| O(%)        | 16.4                      | 2.1                          | 1.8                          |
| C (%)       | 69.9                      | 84.3                         | 84.6                         |
| N (%)       | 5.5                       | 5.2                          | 5.1                          |
| N-Mo        | 46.5                      | 25.5                         | 30.2                         |
| Pyridinic-N | 43.2                      | 29.6                         | 40.1                         |
| Pyrrolic-N  | 10.3                      | 12.8                         | 29.7                         |
| Graphitic-N | 0                         | 32.1                         | 0                            |

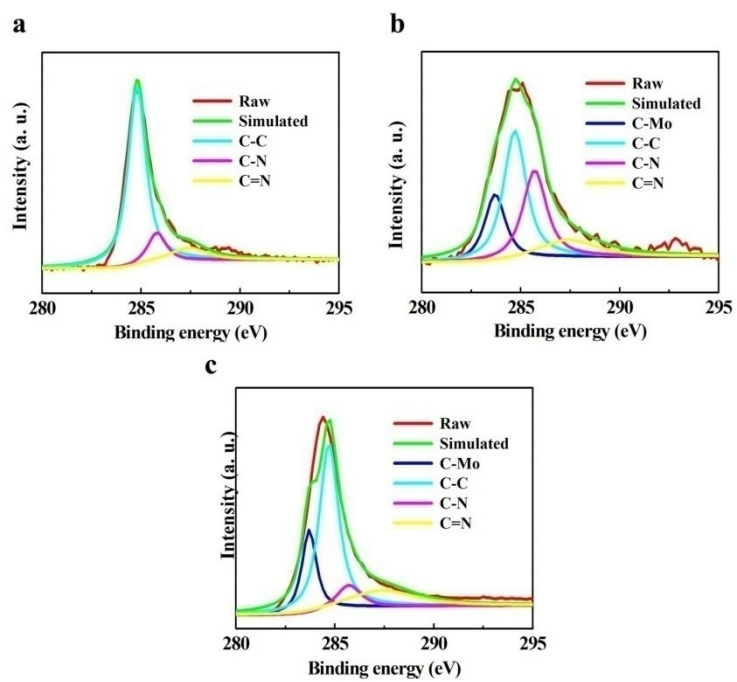

**Fig. S1** High resolution C1s XPS of (a)  $\text{MoO}_2@\text{NC}$ ; (b)  $\text{Mo}_2\text{C}@\text{NC(A)}$ ; (c)  $\text{Mo}_2\text{C}@\text{NC(B)}$ .

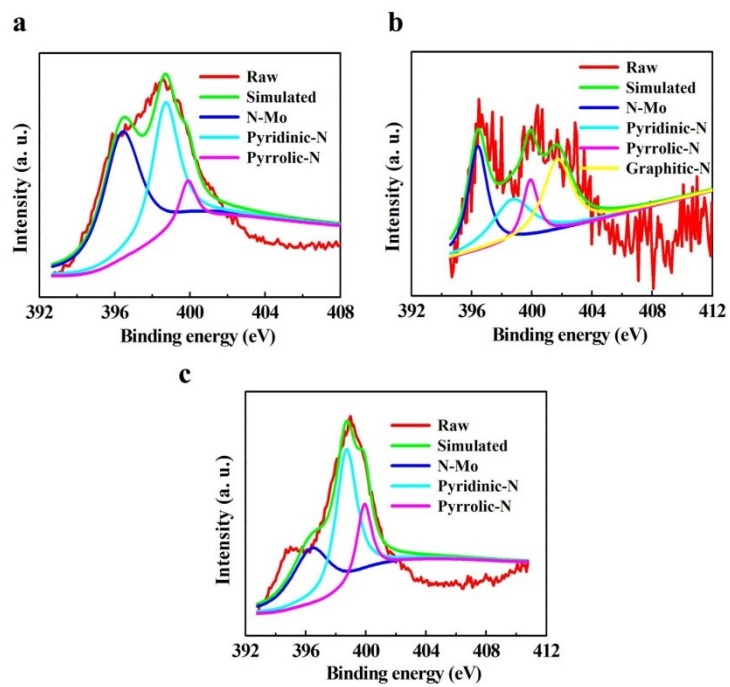

**Fig. S2** High resolution N1s XPS of (a)  $\text{MoO}_2@\text{NC}$ ; (b)  $\text{Mo}_2\text{C}@\text{NC(A)}$ ; (c)  $\text{Mo}_2\text{C}@\text{NC(B)}$ .

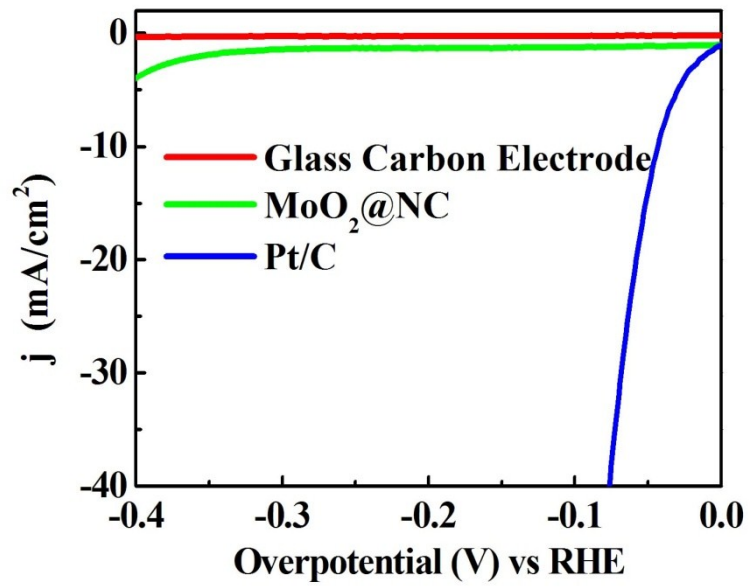

**Fig. S3** Polarization curves of Pt/C, glass carbon electrode and **MoO<sub>2</sub>@NC** in 1.0 M KOH.

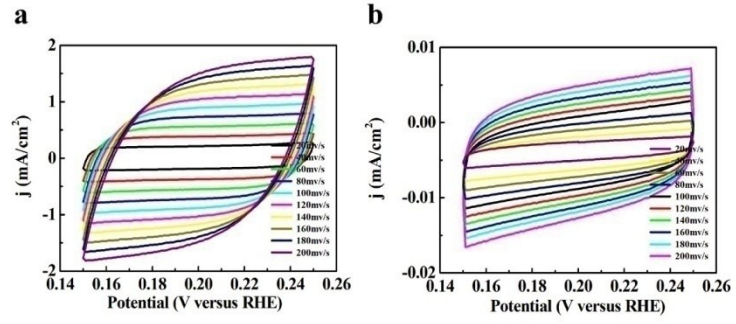

**Fig. S4** CV curves in the potential range without redox current peaks of (a)  $\text{Mo}_2\text{C@NC(A)}$  in 1.0 M KOH; (b)  $\text{Mo}_2\text{C@NC(B)}$  in 1.0 M KOH.



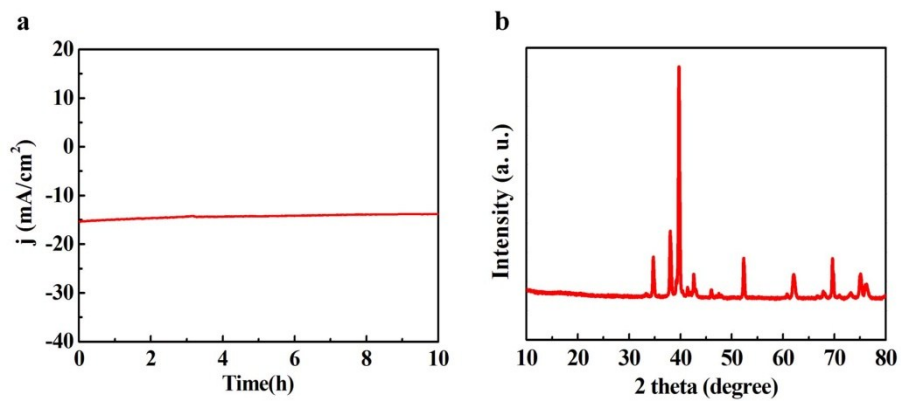

**Fig. S5** (a) Time dependence current density of **Mo<sub>2</sub>C@NC(A)** for 10 h in 0.5 M H<sub>2</sub>SO<sub>4</sub>;  
(b) recycled PXRD of **Mo<sub>2</sub>C@NC(A)** after 10 h.
